# Supplementary material for: Shared and Unique Patterns of DNA Methylation in Systemic Lupus Erythematosus and Primary Sjögren's Syndrome
Source: PubMed Central journal article supplement (PMC6688520; doi:10.3389/fimmu.2019.01686), 2019-07-30
Supplement: Image_1.pdf [file Image_1.pdf]

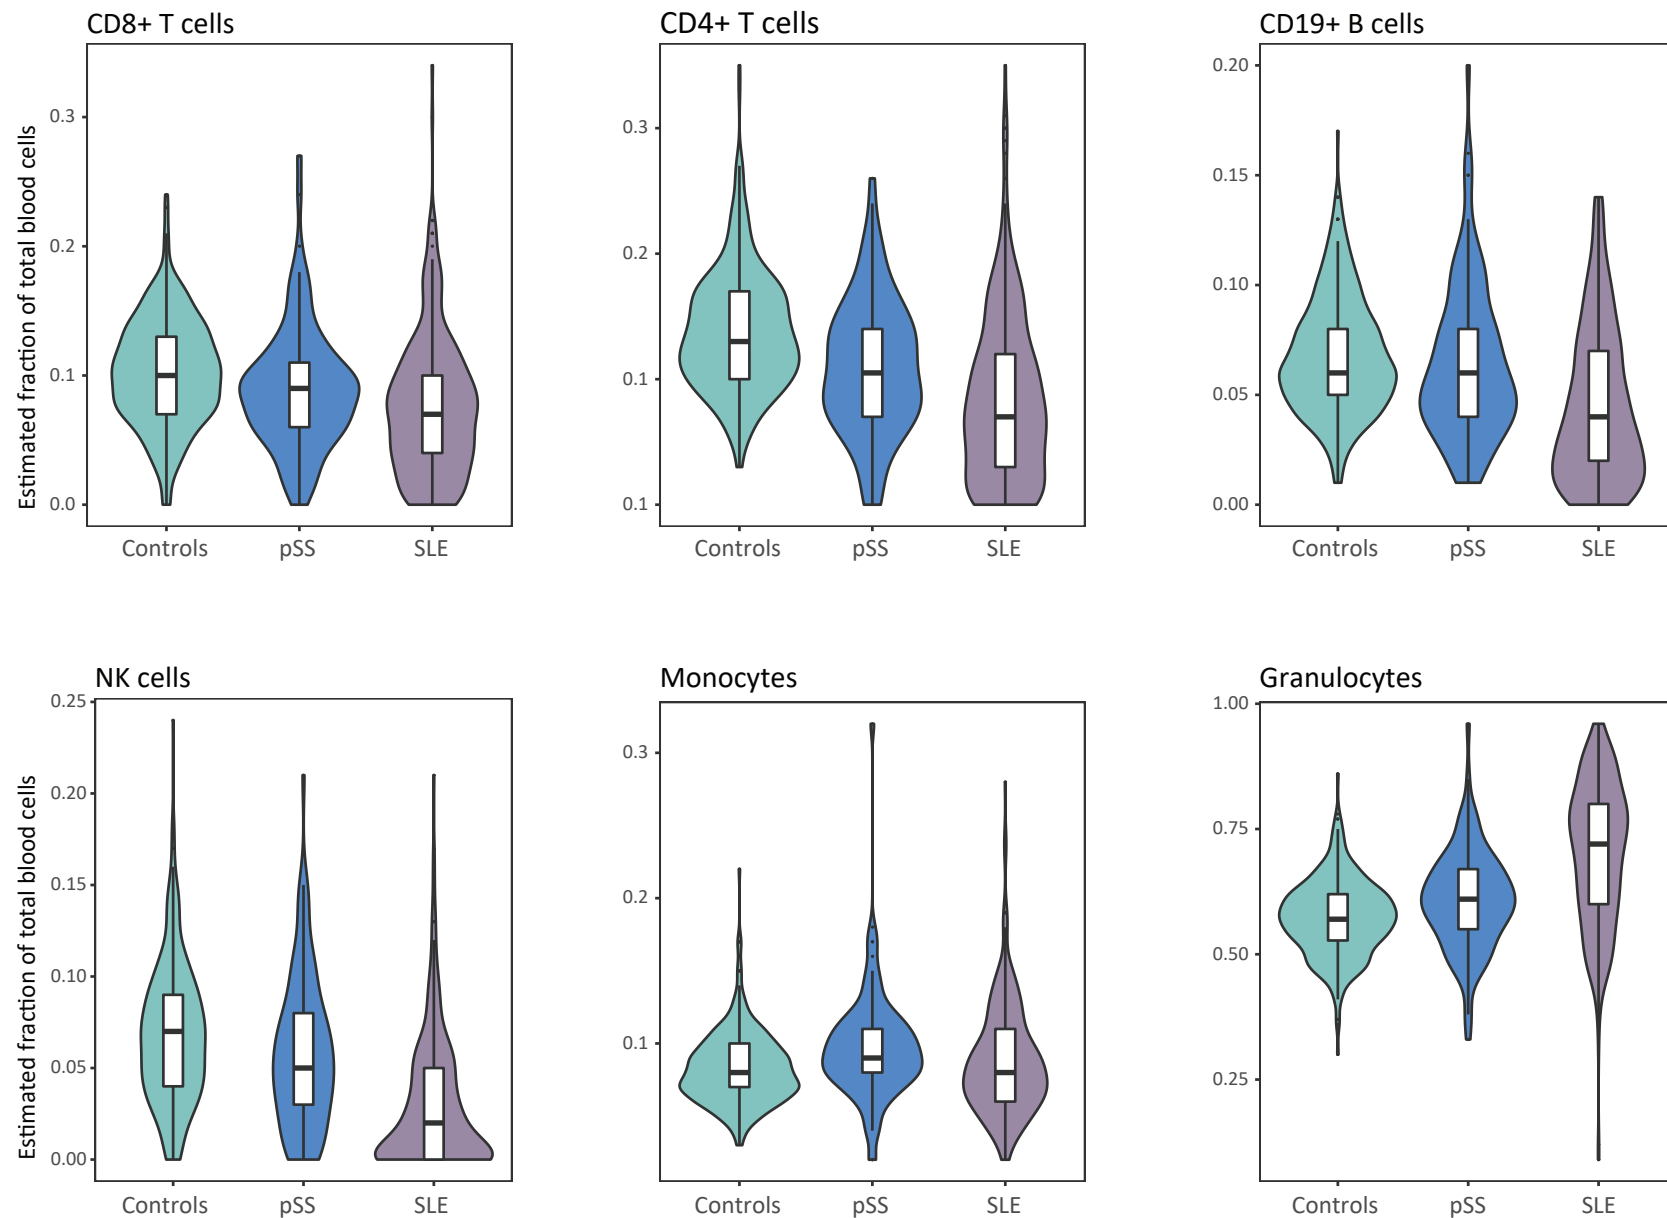

**Supplementary Figure S1**

**Blood cell type distribution estimates.** Violin plots with box plots depicting the estimated cell type fractions in whole blood samples from healthy controls (n=400), patients with pSS (n=100) and patients with SLE (n=347) for CD8+ T cells, CD4+ T cells, CD19+ B cells, natural killer (NK) cells, monocytes and granulocytes.
