# Supplementary material for: Shared and Unique Patterns of DNA Methylation in Systemic Lupus Erythematosus and Primary Sjögren's Syndrome
Source: PubMed Central journal article supplement (PMC6688520; doi:10.3389/fimmu.2019.01686), 2019-07-30
Supplement: Image_2.pdf [file Image_2.pdf]

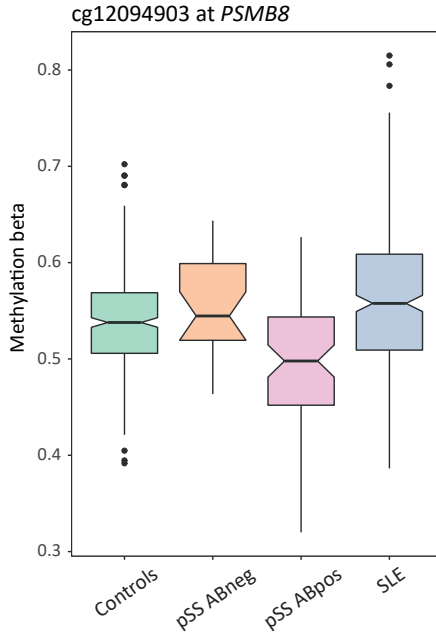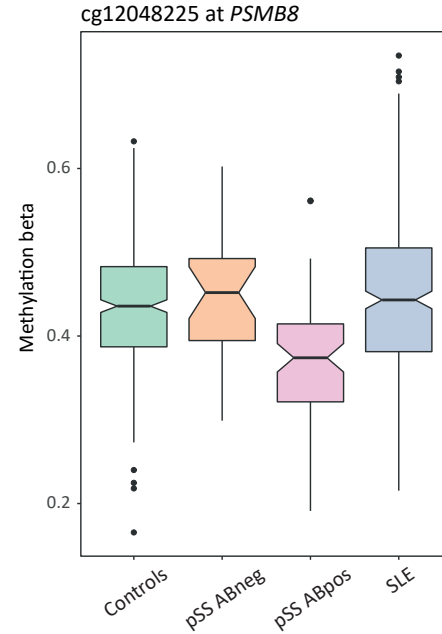

### Supplementary Figure S2

**Differential DNA methylation at the *PSMB8* locus.** Box plots of DNA methylation levels for controls (n=400), patients with pSS stratified for anti-SSA/SSB negative pSS (n=25) and anti-SSA/SSB positive pSS (n=75) and patients with SLE (n=347) with a notch indicating the group median methylation  $\beta$  at cg12094903 and cg12048225 located within the *PSMB8*-TAP2 locus on chromosome 6.
